# Supplementary material
Source: publisher site journal article supplement (https://www.spandidos-publications.com/7730/downloadSupplementary)

Figure S1. OR and 95% CI of the associations between MEG3 rs11160608 A>C polymorphism and cancer susceptibility in AC + CC vs. AA model. OR, odds ratio; MEG3, maternally expressed gene 3.

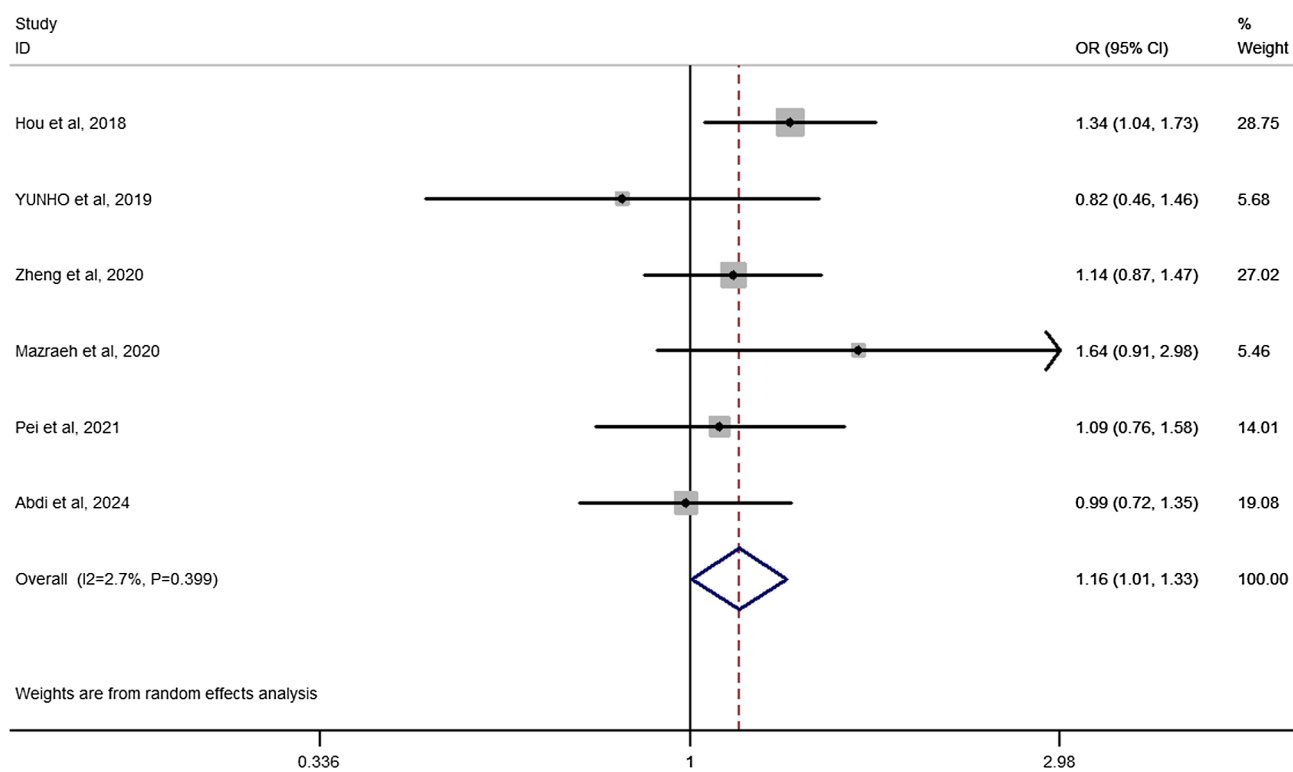

Figure S2. Cumulative meta-analyses according to publication year in AC + CC vs. AA model of MEG3 rs11160608 A>C polymorphism. OR, odds ratio; MEG3, maternally expressed gene 3.

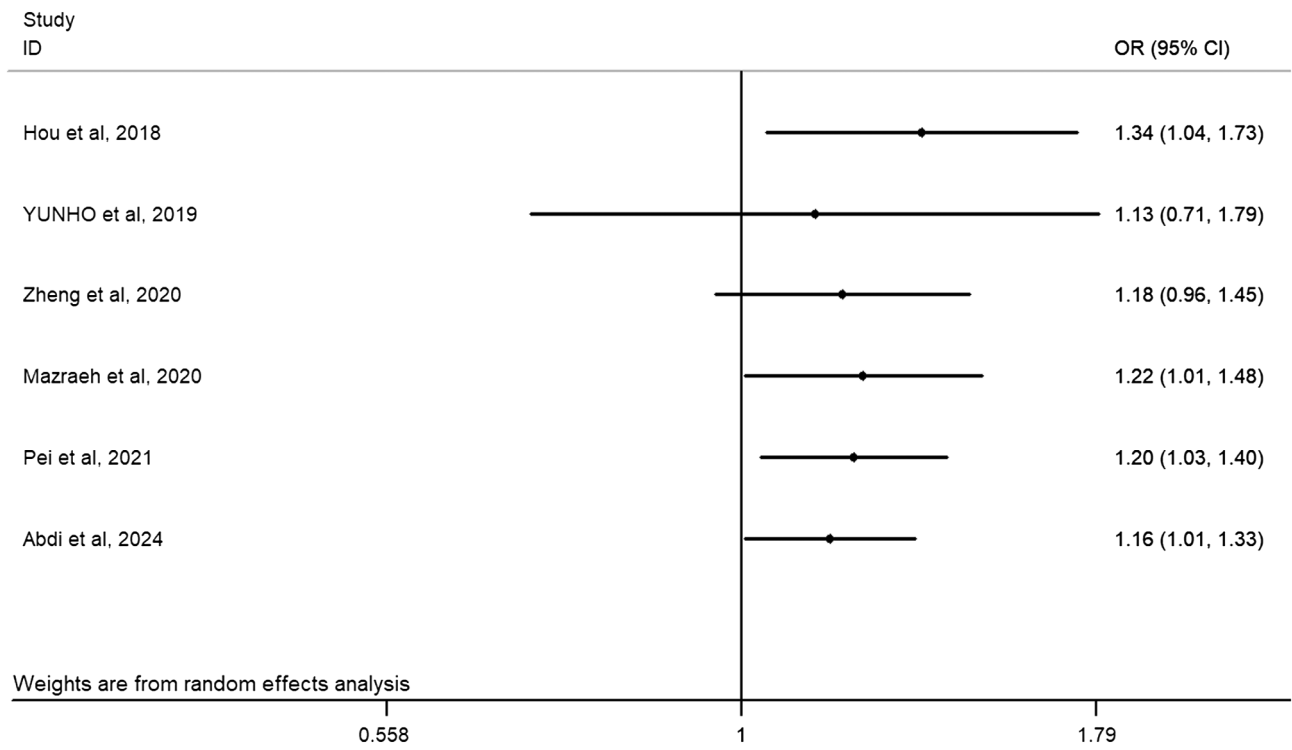

Figure S3. Sensitivity analysis through deleting each study to reflect the influence of the individual dataset to the pooled ORs in AC + CC vs. AA model of MEG3 rs11160608 A>C polymorphism. OR, odds ratio; MEG3, maternally expressed gene 3.

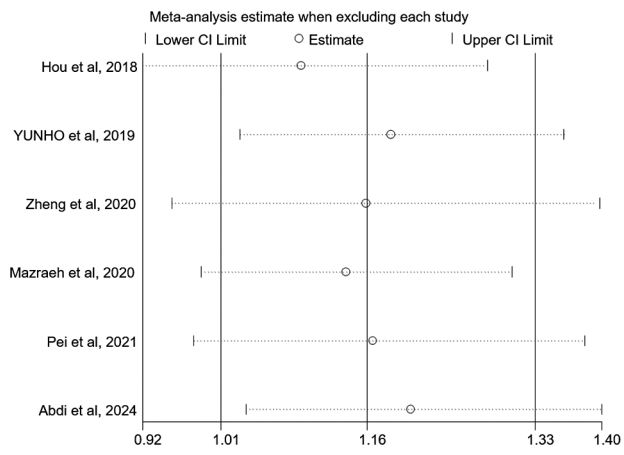

Figure S4. Funnel plot analysis to detect publication bias for AC + CC vs. AA model of MEG3 rs11160608 A>C polymorphism. Circles represent the weight of the studies. MEG3, maternally expressed gene 3; SE, standard error.

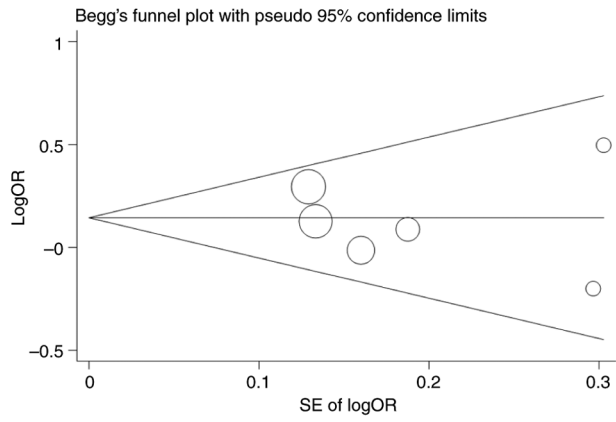

Supplement: Supplementary file 1 [file downloadSupplementary]
